# Supplementary material for: The ribosome‐associated chaperone Zuo1 controls translation upon TORC1 inhibition
Source: PubMed Central journal article supplement (PMC10711665; doi:10.15252/embj.2022113240), 2023-11-20
Supplement: EMBJ-42-e113240-s007.pdf [file EMBJ-42-e113240-s007.pdf]

## Expanded View Figures

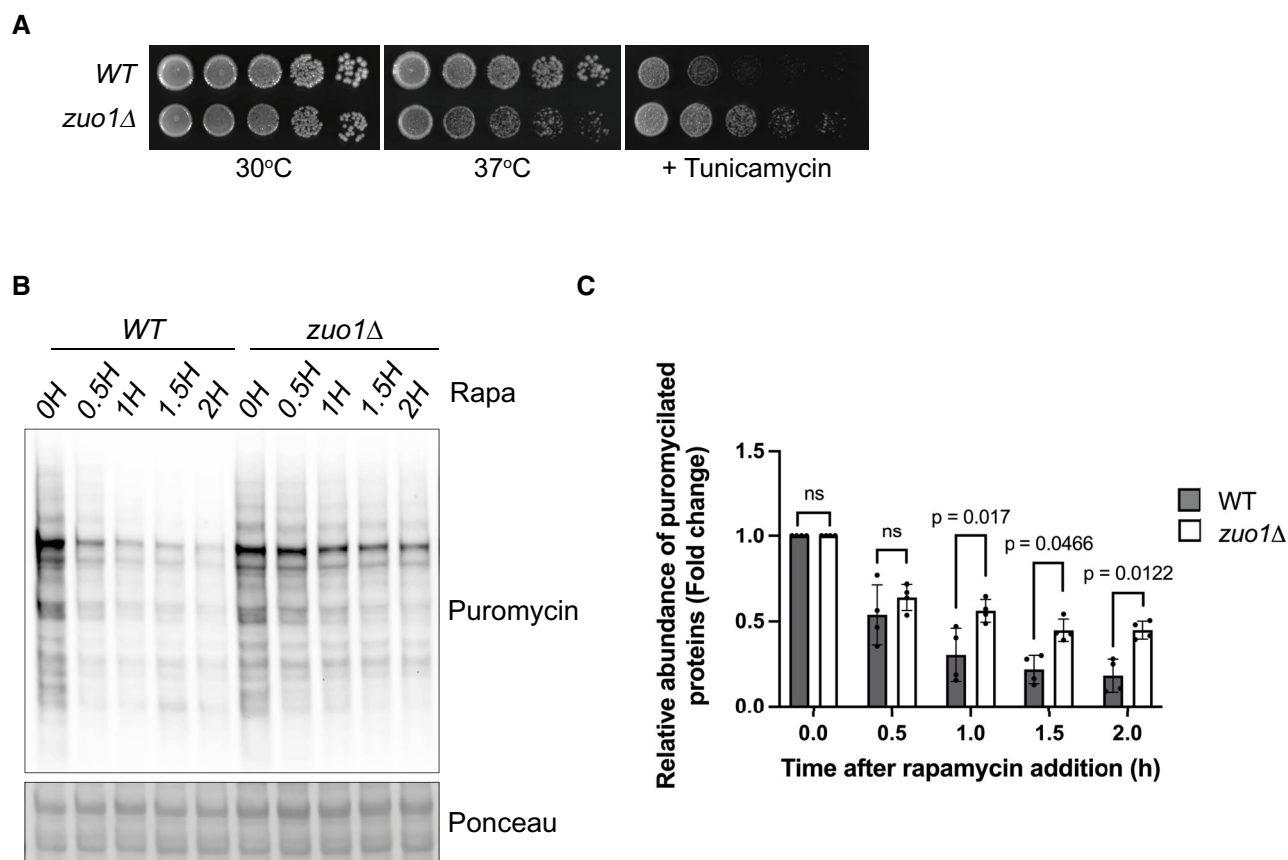

**Figure EV1. Sensitivity of Zuo1 to other stresses.**

- A Fivefold serial dilutions of the indicated strains grown on YEPD plates with or without 0.75  $\mu\text{g/ml}$  tunicamycin for 4 days at 30 or 37°C, where indicated.
- B Immunoblot analysis of lysates from WT and *zuo1Δ* cells pulse-chased with 0.5 mM puromycin for 15 min before being treated with 35  $\mu\text{g/ml}$  cycloheximide for the indicated time. Ponceau staining served as the loading control.
- C Graph shows densitometry analysis (mean  $\pm$  s.d.) of the relative abundance of puromycylated proteins (normalised to Pgk1 levels) from (B) relative to the 0H time point. Statistical significance was assessed using two-way ANOVA t-test ( $n = 4$  independent biological replicates). n.s. (not significant).

Source data are available online for this figure.

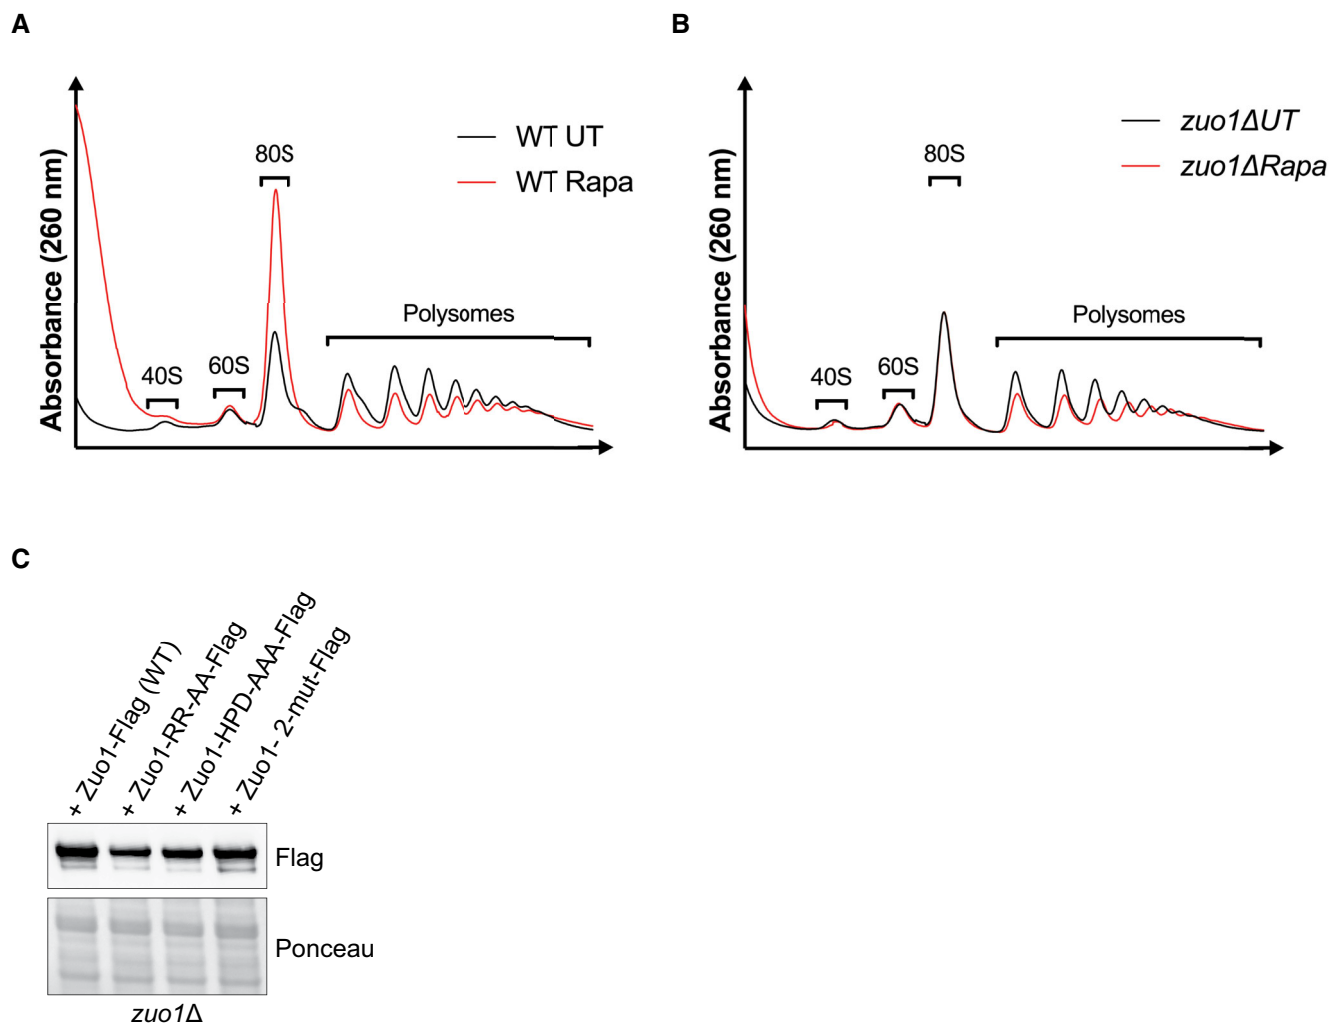

**Figure EV2. Polysome profiling analysis of WT and *zuo1*Δ cells.**

A, B Polysome profiles of WT (A) and *zuo1*Δ (B) strains either treated with 200 nM rapamycin for 2 h or left untreated. Total extracts were separated on 10–50% sucrose gradients and subsequently the  $A_{260}$  was monitored during fractionation.

C Immunoblot analysis of lysates from *zuo1*Δ cells expressing Flag-tagged WT and mutants Zuo1 on a plasmid. Ponceau staining served as the loading control.

Source data are available online for this figure.

**Figure EV3. Gene ontology analysis of Zuo1 interactors.**

A Protein–protein interaction network of Zuo1 interactors having at least 50% peptide coverage.

B Gene ontology analysis of Zuo1 interactors having at least 50% peptide coverage.

C Table showing Zuo1 interactors having their total protein level significantly increased or decreased by 1.5-fold based on multiplexed quantitative proteomics (<https://www.science.org/doi/10.1126/scisignal.2002548>). Zuo1 interactors more and less bound to Zuo1-GFP upon rapamycin treatment are shown in red and blue respectively.

D Immunoblot analysis of lysates from WT cells containing Ura7-5xFLAG at the endogenous locus treated with 200 nM rapamycin for 2 h or left untreated. Ponceau staining served as the loading control.

Source data are available online for this figure.

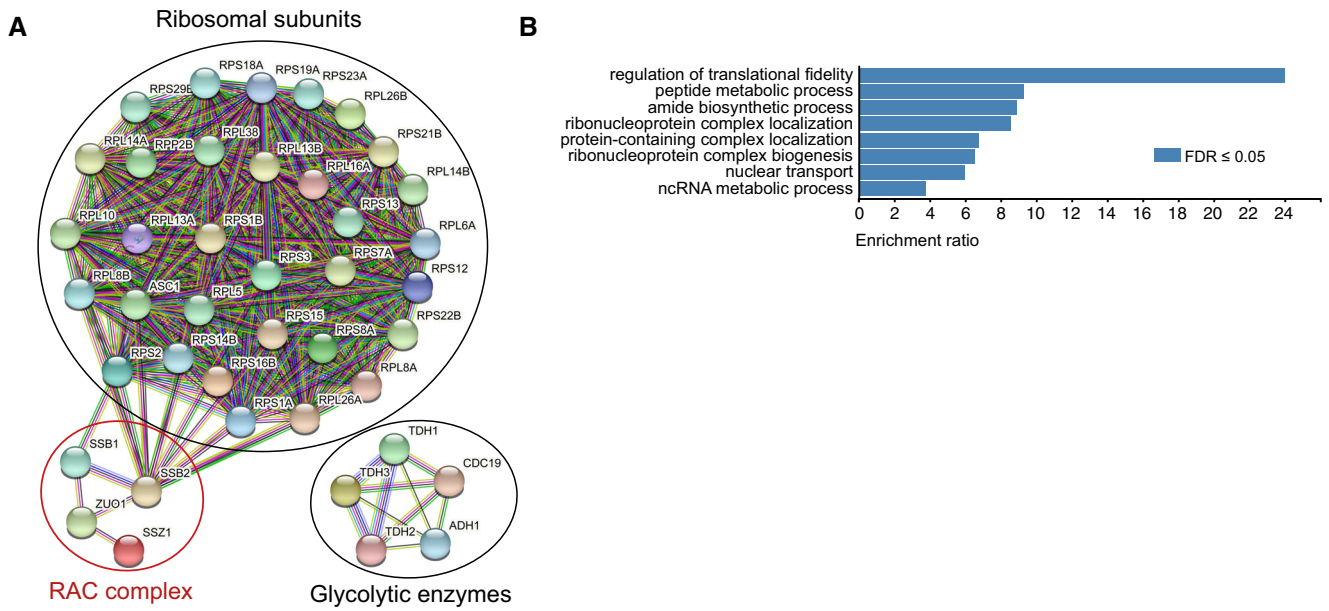

**C**

| Hits induced by rapamycin | Hits unaffected by rapamycin | Hits reduced by rapamycin | Hits not detected |
|---------------------------|------------------------------|---------------------------|-------------------|
| CPS1                      | LSP1                         | TIF4631                   | ARO10             |
| CPA2                      | HYR1                         | URA7                      | BAT2              |
| TDH1                      | TRP3                         |                           | ADH5              |
| AIM41                     | VPS4                         |                           | SNA2              |
| HSP26                     | FMP52                        |                           |                   |
| PET10                     | GTT1                         |                           |                   |
| SDH1                      | DAK1                         |                           |                   |
| SRY1                      | ADE8                         |                           |                   |
| HFD1                      | PIL1                         |                           |                   |
| SDH2                      | TUM1                         |                           |                   |
| PEP4                      | TDH2                         |                           |                   |
| ALT1                      | ACO1                         |                           |                   |
| TSL1                      | APA1                         |                           |                   |
| GGA1                      | LYS20                        |                           |                   |
| PNC1                      | MAE1                         |                           |                   |
| DLD3                      |                              |                           |                   |
| HSP78                     |                              |                           |                   |
| DUR1,2                    |                              |                           |                   |
| DCS1                      |                              |                           |                   |
| PYC1                      |                              |                           |                   |
| MPM1                      |                              |                           |                   |
| LYS21                     |                              |                           |                   |

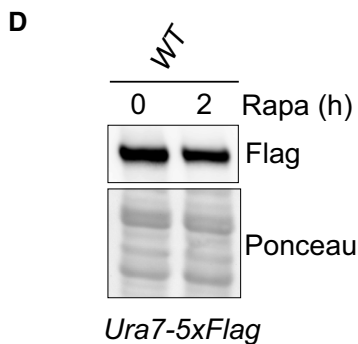

Figure EV3.

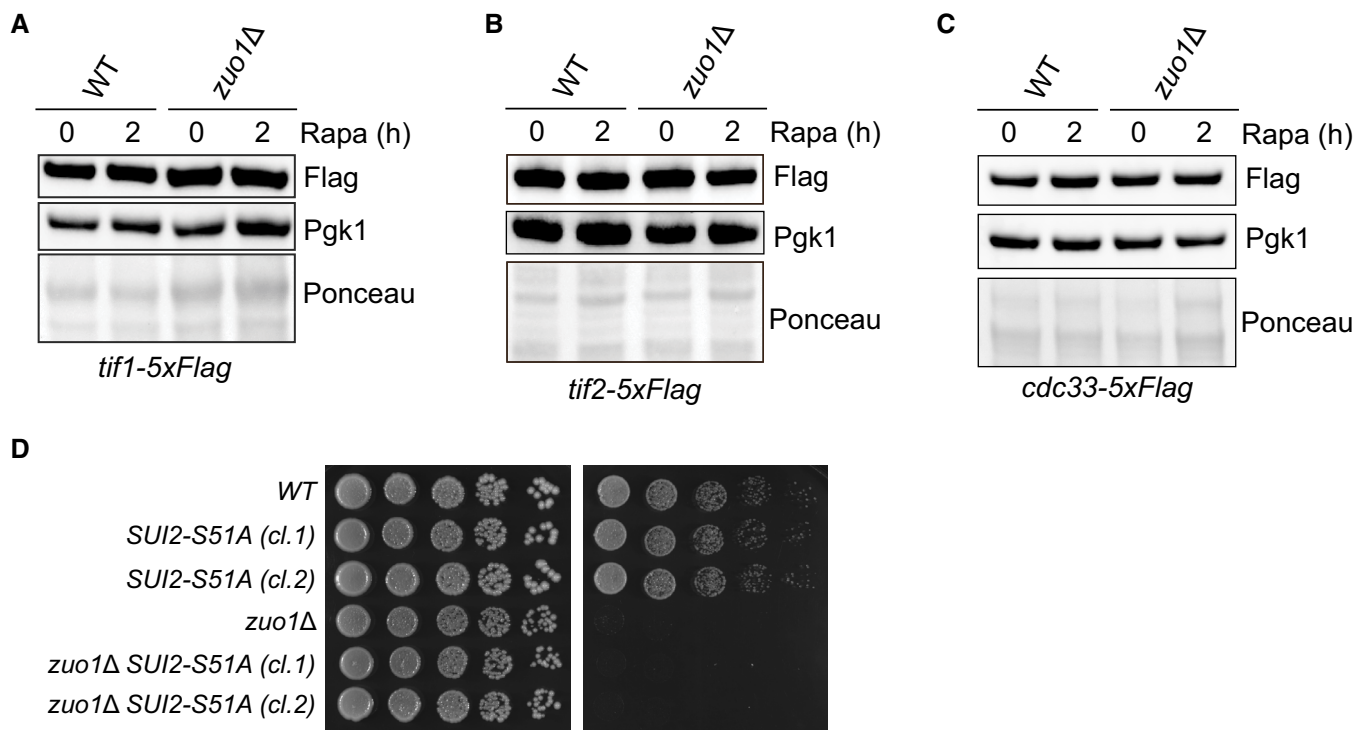

**Figure EV4. Abundance of eIF4F subunits upon TORC1 inhibition.**

A–C Immunoblot analysis of lysates from WT and *zuo1Δ* cells containing TIF1-5xFLAG (A), TIF2-5xFLAG (B), or CDC33-5xFLAG (C) at the endogenous locus treated with 200 nM rapamycin for 2 h or left untreated. Ponceau and Pgk1 staining served as the loading control.

D Fivefold serial dilutions of the indicated strains grown on YEPD plates with or without 20 ng/ml rapamycin for 4 days at 30°C.

Source data are available online for this figure.

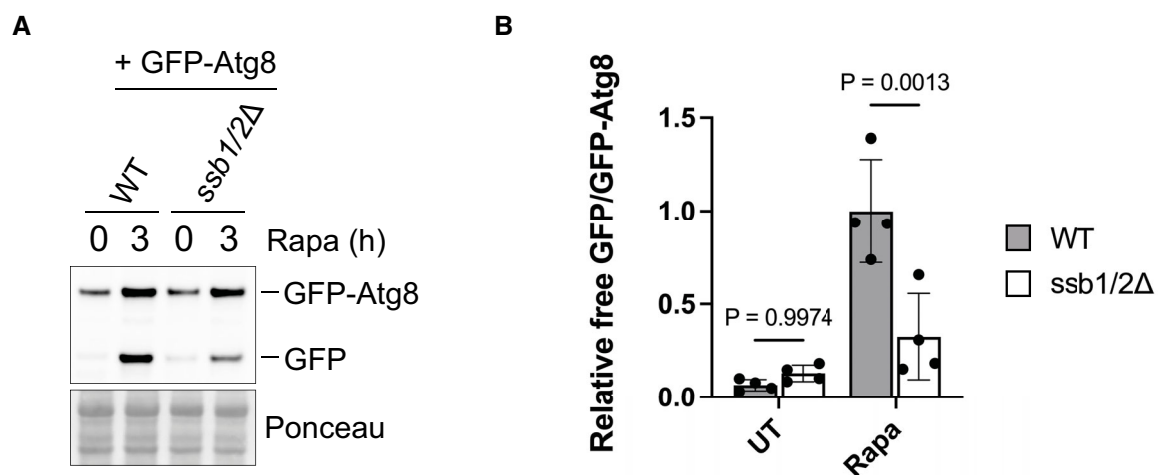

**Figure EV5. Autophagy analysis in *ssb1/2Δ* cells.**

A Immunoblot analysis of lysates from WT and *ssb1/2Δ* cells expressing GFP-Atg8 on a plasmid treated with 200 nM rapamycin for 3 h or left untreated. Ponceau staining served as the loading control.

B Graph shows densitometry analysis (mean  $\pm$  s.d.) of the relative abundance of GFP-Atg8 and free GFP from (A), relative to the 0 h time point. Statistical significance was assessed using two-way ANOVA *t*-test ( $n = 4$  independent biological replicates). n.s. (not significant).

Source data are available online for this figure.
